# Supplementary material for: Systematic Review of Anthocyanins and Markers of Cardiovascular Disease
Source: Nutrients. 2016 Jan 9;8(1):32. doi: 10.3390/nu8010032 (PMC4728646; doi:10.3390/nu8010032)
Supplement: Supplementary file 1 [file nutrients-08-00032-s001.xlsx]

## Sheet: Sheet1
Supplementary Materials : Systematic Review of Anthocyanins and Markers of Cardiovascular Disease
Table S1. SIGN checklist for controlled trials.
Number	Question	Possible responses	Curtis et al.2009	Gurrola-Diaz et al. 2010	Hansen et al. 2005	Hassellund et al. 2012	Hassellund et al. 2013	Herrera-Arellano et al. 2004	Herrera-Arellano et al. 2007	Karlsen et al. 2007	Kianbakht et al. 2014	Naruszewicz et al. 2007	Qin et al. 2009	Soltani et al. 2014	Zhu et al. 2011	Zhu et al. 2013	Zibadi et al. 2007
1.1	The study addresses an appropriate and clearly focused question.	Yes-No-Can't Say	Yes	Yes	Yes	Yes	Yes	Yes	Yes	Yes	Yes	Yes	Yes	Yes	Yes	Yes	Yes
1.2	The assignment of subjects to treatment groups is randomised.	Yes-No-Can't Say	Yes	Yes	Yes	Yes	Yes	Yes	Can't say	Yes	Yes	Can't say	No	Yes	Yes	Yes	Yes
1.3	An adequate concealment method is used.	Yes-No-Can't Say	Yes	No	No	Yes	Yes	No	Yes	Can't say	Yes	Yes	Yes	Yes	Can't say	Can't say	Can't say
1.4	Subjects and investigators are kept ‘blind’ about treatment allocation.	Yes-No-Can't Say	Yes	No	No	Yes	Yes	No	Yes	Can't say	Yes	Yes	Yes	Yes	Yes	Yes	Yes
1.5	The treatment and control groups are similar at the start of the trial.	Yes-No-Can't Say	Yes	Yes	Yes	Yes	Yes	No	Can't say	Yes	Yes	Yes	Yes	Can't say	Yes	Yes	Yes
1.6	The only difference between groups is the treatment under investigation.	Yes-No-Can't Say	Yes	Yes	Yes	Yes	Yes	Yes	Yes	Yes	Yes	Yes	Yes	Yes	Yes	Yes	Yes
1.7	All relevant outcomes are measured in a standard, valid and reliable way.	Yes-No-Can't Say	Yes	Yes	Yes	Yes	Yes	Yes	Yes	Yes	Yes	Yes	Yes	Can't say	Can't say	Yes	Yes
1.8	What percentage of the individuals or clusters recruited into each treatment arm of the study dropped out before the study was completed?	%	7% intervention, 11% placebo	Can't say	Can't say	13% (cross-over 11% initial AT, 27% initial PT)	13% (cross-over 11% initial AT, 27% initial PT)	28% treatment, 14% control	not reported	2% treatment, 2% control	22% treatment, 26% control	Can't say	0% in both groups	8% in both groups	3% in both groups	3% in both groups	0% in both groups
1.9	All the subjects are analysed in the groups to which they were randomly allocated (often referred to as intention to treat analysis)	Yes-No-Can't Say	Can't say	Can't say	Can't say	Can't say	Can't say	Can't say	No	Can't say	Yes	Can't say	Can't say	Can't say	Can't say	Can't say	Can't say
1.10	Where the study is carried out at more than one site, results are comparable for all sites.	Yes-No-Can't Say	N/A	N/A	N/A	N/A	N/A	N/A	N/A	N/A	N/A	N/A	N/A	N/A	Can't study	Can't say	N/A
2.1	How well was the study done to minimise bias?	High quality-acceptable-reject	High quality	Acceptable	Acceptable	Acceptable	Acceptable	Reject	Acceptable	Acceptable	Acceptable	Acceptable	High quality	High quality	Acceptable	Acceptable	Acceptable
2.2	Taking into account clinical considerations, your evaluation of the methodology used, and the statistical power of the study, are you certain that the overall effect is due to the study intervention?	Yes-No	Yes	No	Yes	Yes	Yes	No	Yes		No	Yes	Yes	Yes	Yes	Yes	Yes
2.3	Are the results of this study directly applicable to the patient group targeted by this guideline?*	Yes	Yes	Yes	Yes	Yes	Yes	Yes	Yes		Yes	Yes	Yes	Yes	Yes	Yes	Yes
2.4	Notes. Summarise the authors’ conclusions. Add any comments on your own assessment of the study, and the extent to which it answers your question and mention any areas of uncertainty raised above.														study with BP results	study with lipid results
	* This question may be irrelevant specific to Scottish part, but considering it a question about overall representativeness or generalizability.
